# Supplementary material
Source: publisher site journal article supplement (https://www.dovepress.com/get_supplementary_file.php?f=448861.docx)
Supplement: Supplementary file 1 [file get_supplementary_file.php]

**Appendix 1: Questionnaire on the onset and treatment of genital pain**

Part 1: Questions on the onset of the disease (before beginning therapy)

1. How old were you when the pain started?

...... years

2. Is there a connection between the onset of the pain and a specific event?

☐ Birth

☐ Surgery (in the area of the pelvic floor or genitals)

☐ Accident (e.g., car accident)

☐ Back/hip injury

☐ Chemotherapy or local radiotherapy

☐ No connection remembered

3. Did the pain occur at a localized spot in the genital area (which you could name), was it diffusely distributed or a mixture of both?

☐ localized ☐ diffuse ☐ mixed

4. If your pain can be localized, where exactly is the affected area? (multiple choices possible)

☐ Vaginal entrance (1)


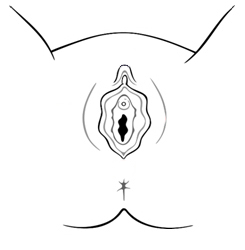


**1**

**2**

**3**

**4**

**5**

☐ Opening of the urethra (2)

☐ Clitoris (3)

☐ Inner labia (4)

☐ Outer labia (5)

☐ Inside the vagina, not external (not in the sketch)

☐ Pain cannot be localized

4. Could the pain be triggered (e.g., by sexual intercourse, insertion of a tampon, cycling or tight clothes) or did it occur spontaneously? Or both possibilities?

☐ Triggered ☐ Spontaneous ☐ Both

5. Has this pain always been present (e.g., since the beginning of sexual intercourse, since the first insertion of a tampon) or did it start after a pain-free period (i.e., pain-free sexual intercourse was possible at the beginning)?

☐ always ☐ after a pain-free period

6. Was the pain constant or were there also pain-free intervals?

☐ Constant ☐ with pain-free intervals

7. How often did the pain occur on average?

☐ several times a day ☐ once a day ☐ several times a week

☐ once a week ☐ several times a month ☐ once a month

☐ less frequently

8. How long did your pain last on average?

☐ seconds ☐ minutes ☐ hours ☐ up to 3 days ☐ more than 3 days

9. Did you feel cramping or tightness during sexual intercourse or when inserting tampons?

☐ Always ☐ Sometimes ☐ Never

10. Do the following statements apply to you? (at the time of pain onset )

Please answer yes/no.

a. Do you also suffer from other chronic pain symptoms such as

irritable bladder, irritable bowel syndrome, fibromyalgia, temporomandibular joint pain?

☐ Yes ☐ No

b. Were you taking the pill for hormonal contraception or estrogens for other reasons before the pain started? (taking > 1 year)

☐ Yes ☐ No

c. Did you suffer from frequent fungal infections in the vulva area before the onset of the pain? (>4x/year)

☐ Yes ☐ No

d. Due to the frequent fungal infections, did you have to use antifungal agents (vaginal tablets, suppositories, ointments) several times a year?

☐ Yes ☐ No

e. Did you have frequent bladder infections before the onset of the pain? (>3x/year)

☐ Yes ☐ No

f. Did you have to take antibiotics several times a year due to frequent bladder infections?

☐ Yes ☐ No

g. Did you notice any tension in your pelvic floor at the time of the pain?

☐ Yes ☐ No

f. Did you suffer from sleep disorders before the pain started?

☐ Yes ☐ No

h. Did you suffer from depression or anxiety before the pain began?

☐ Yes ☐ No

i. Before the onset of the pain, did you ever have any physically harmful sexual experiences?

☐ Yes ☐ No

k. Before the onset of the pain, did you ever have any emotionally hurtful sexual

experiences?

☐ Yes ☐ No

l. Do you suffer from one or more allergies?

☐ Yes ☐ No

Part 2: Questions about treatment

Have you tried one or more of the following therapies since the onset of your symptoms and taken them as prescribed? Please select as applicable (multiple choices possible),

and, if applicable, to what extent the symptoms have changed. (single choice)

**☐ Behavioral changes:**

Avoidance of synthetic underwear and tights, perfumed soaps, fabric softener for underwear. Use of more skin-friendly shower products.

Change in symptoms:

☐ Distinctly improved

☐ Slightly improved

☐ Unchanged

☐ Slightly worsened

☐ Distinctly worsened

**☐ Physiotherapy**

Pelvic floor rehabilitation with mobilization, trigger point treatment, biofeedback, acupuncture, vaginal dilators

Change in symptoms:

☐ Distinctly improved

☐ Slightly improved

☐ Unchanged

☐ Slightly worsened

☐ Distinctly worsened

**☐ Alternative healing methods**

Relaxation exercises to reduce stress, yoga, meditation, hypnosis, exercise

Change in symptoms:

☐ Distinctly improved

☐ Slightly improved

☐ Unchanged

☐ Slightly worsened

☐ Distinctly worsened

**☐ Psychological or psychosexual therapy**

Behavioral therapy, sexual therapy

Change in symptoms:

☐ Distinctly improved

☐ Slightly improved

☐ Unchanged

☐ Slightly worsened

☐ Distinctly worsened

**☐ Local therapy (creams, ointments)**

by applying a **moisturizing or greasy** cream (Deumavan®, Premandol®, almond oil ointment)

Change in symptoms:

☐ Distinctly improved

☐ Slightly improved

☐ Unchanged

☐ Slightly worsened

☐ Distinctly worsened

**☐ Local therapy (creams, ointments)**

by applying an **anesthetic lidocaine** cream (Xylocaine®)

Change in symptoms:

☐ Distinctly improved

☐ Slightly improved

☐ Unchanged

☐ Slightly worsened

☐ Distinctly worsened

**☐ Local therapy (creams, ointments)**

In the form of a **hormone cream** with estrogen (Oestro-Gynaedron®)

Change in symptoms:

☐ Distinctly improved

☐ Slightly improved

☐ Unchanged

☐ Slightly worsened

☐ Distinctly worsened

**☐ Local therapy (creams, ointments)**

In the form of a **steroid cream** (Dermovate®, Elocom®)

Change in symptoms:

☐ Distinctly improved

☐ Slightly improved

☐ Unchanged

☐ Slightly worsened

☐ Distinctly worsened

**☐ Oral Medication**

In the form of **antidepressants**: tricyclic antidepressants (e.g. Saroten®, Nortrilen®), SNRI (Cymbalta®, Efexor®) or SSRI (Seropram®, Cipralex®, Zoloft®)?

Change in symptoms:

☐ Distinctly improved

☐ Slightly improved

☐ Unchanged

☐ Slightly worsened

☐ Distinctly worsened

☐ **Oral Medication**

In the form of **neuroleptics** (nerve modulators): Gabapentin, Pregabalin (Lyrica®, Neurontin®)

Change in symptoms:

☐ Distinctly improved

☐ Slightly improved

☐ Unchanged

☐ Slightly worsened

☐ Distinctly worsened

**☐ Botox injection (injections)**

Injection of Botox (botulinum neurotoxin) into several areas of the vulva

Change in symptoms:

☐ Distinctly improved

☐ Slightly improved

☐ Unchanged

☐ Slightly worsened

☐ Distinctly worsened

**☐ Steroid injection (injections)**

Injection of cortisone at several painful trigger points

Change in symptoms:

☐ Distinctly improved

☐ Slightly improved

☐ Unchanged

☐ Slightly worsened

☐ Distinctly worsened

**☐ Laser therapy**

Application of CO2 laser to several areas of the vulva

Change in symptoms:

☐ Distinctly improved

☐ Slightly improved

☐ Unchanged

☐ Slightly worsened

☐ Distinctly worsened

**☐ Surgery**

Surgical removal of the affected area (vestibulectomy)

Change in symptoms:

☐ Distinctly improved

☐ Slightly improved

☐ Unchanged

☐ Slightly worsened

☐ Distinctly worsened
